# Supplementary material for: Molecular evolution of haemagglutinin (H) gene in measles virus
Source: PubMed Central journal article supplement (PMC4486977; doi:10.1038/srep11648), 2015-07-01
Supplement: srep11648-s1.pdf [file srep11648-s1.pdf]

## **Molecular evolution of haemagglutinin (*H*) gene in measles virus**

Hirokazu Kimura\*, Mika Saitoh, Miho Kobayashi, Haruyuki Ishii, Takeshi Saraya,  
Daisuke Kurai, Hiroyuki Tsukagoshi, Komei Shirabe, Atsuyoshi Nishina, Kunihisa  
Kozawa, Makoto Kuroda, Fumihiko Takeuchi, Tsuyoshi Sekizuka, Hisanori Minakami,  
Akihide Ryo, and Makoto Takeda\*

\*Corresponding authors

Dr. Hirokazu Kimura, Infectious Disease Surveillance Center, National Institute of  
Infectious Diseases, 4-7-1 Gakuen, Musashimurayama-shi, Tokyo 208-0011, Japan  
Phone: +81-42-561-0771; Fax: +81-42-565-3315; E-mail: kimhiro@nih.go.jp

Dr. Makoto Takeda, Department of Virology III, National Institute of Infectious Diseases,  
4-7-1 Gakuen, Musashimurayama-shi, Tokyo 208-0011, Japan  
Phone: +81-42-561-0771; Fax: +81-42-565-3315; E-mail: mtakeda@nih.go.jp

**Fig. S1. Comparison of Bayesian skyline plot analyses of major genotypes and minor genotypes of the measles virus *H* gene.**

(Left) Minor genotypes; (Right) major genotypes. The solid black lines represent mean effective population sizes. The dotted lines show the 95% highest posterior density intervals.

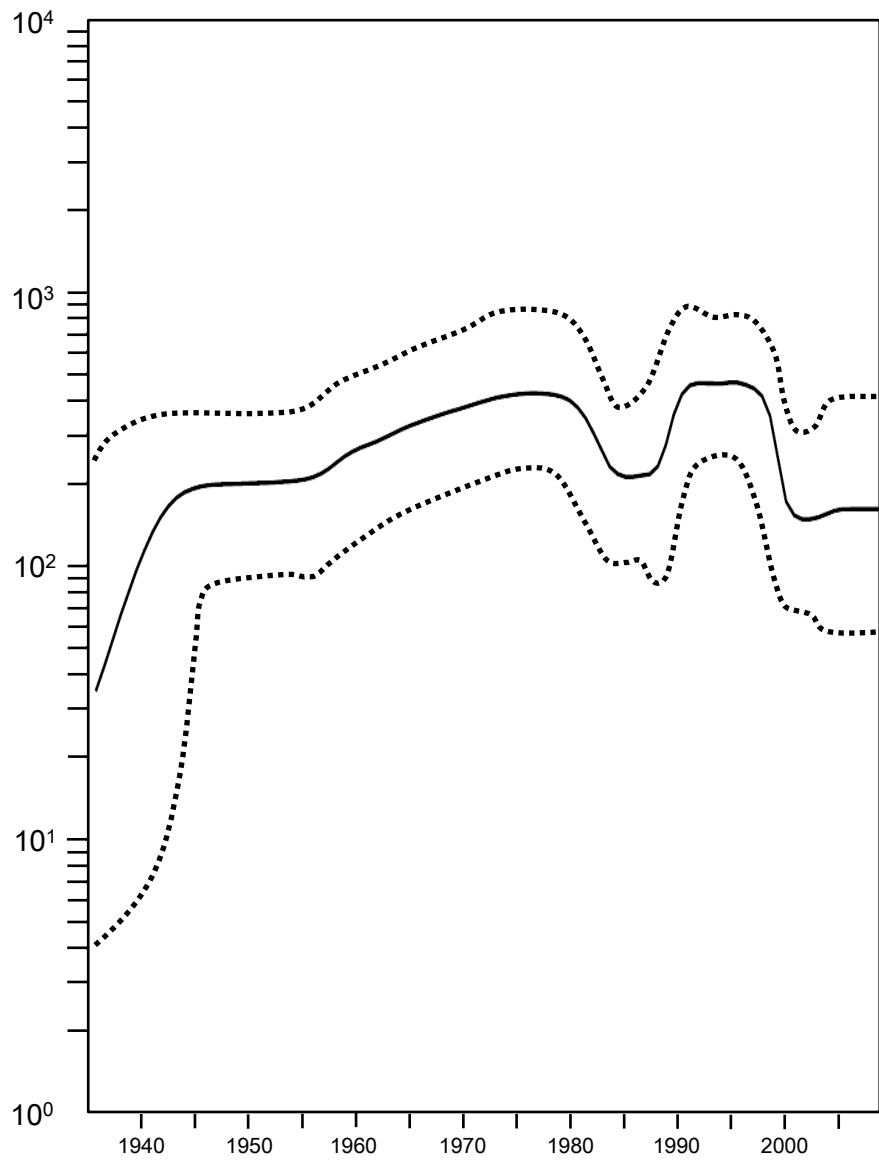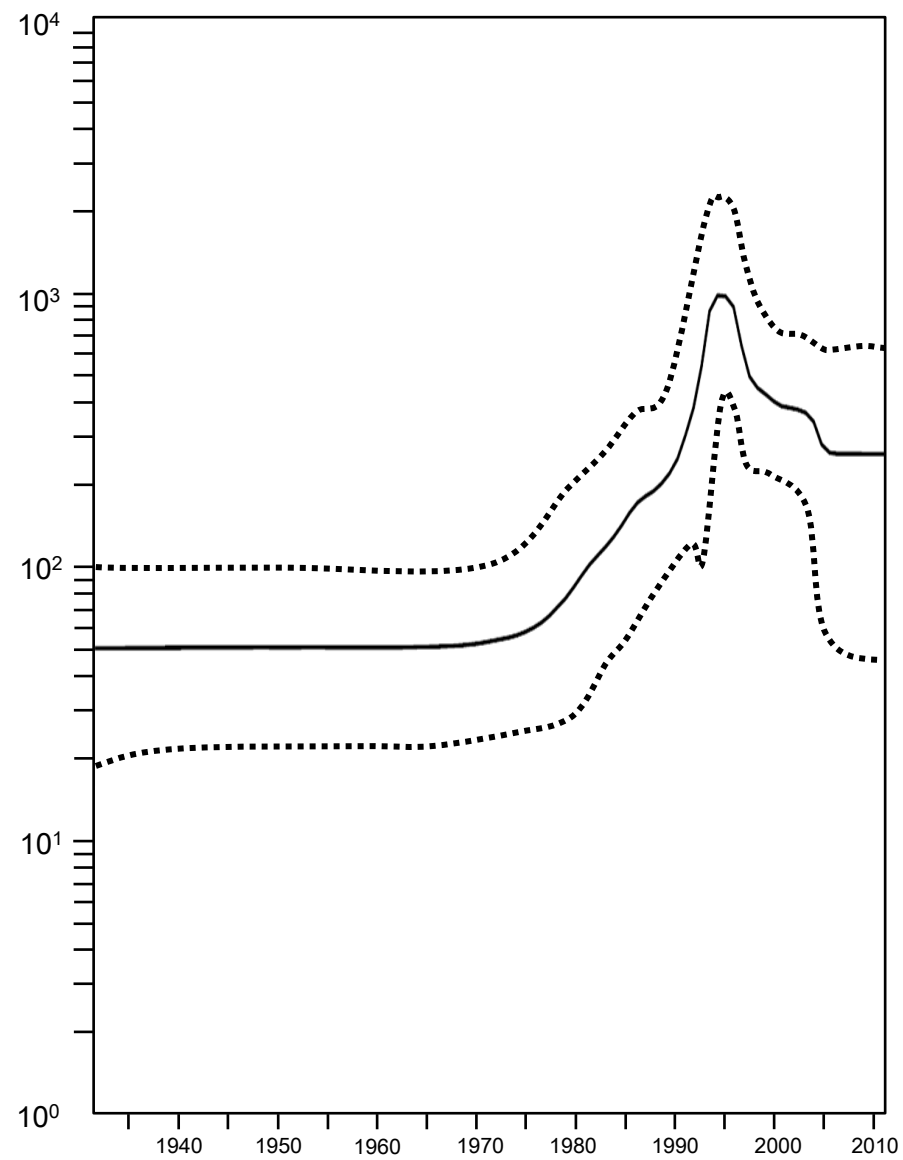

Table S1. MeV strains used in this study

| Genotype | Strain                       | Country       | Collection year | Genbank accession No. |
|----------|------------------------------|---------------|-----------------|-----------------------|
| A        | MVi/Bethesda.Maryland.USA/54 | United States | 1954            | U03669                |
| A        | MVi/USA/64                   | United States | 1964            | Z80791                |
| A        | MVi/Pennsylvania.USA/70/3    | United States | 1970            | U08417                |
| A        | MVi/USA/71                   | United States | 1971            | L46870                |
| A        | MVi/USA/71/2                 | United States | 1971            | X04720                |
| A        | MVi/Delaware.USA/8.96        | United States | 1996            | AF009600              |
| A        | MVi/Changchun.Jilin.CHN/65   | China         | 1965            | U03652                |
| A        | MVi/Shandong.CHN/93/5        | China         | 1993            | AF045204              |
| A        | MVi/IRL/71                   | Ireland       | 1971            | Z80790                |
| A        | MVi/Osaka.JPN/59             | Japan         | 1959            | AB045396              |
| A        | MVi/JPN/68                   | Japan         | 1968            | U03649                |
| A        | MVi/RUS/60                   | Russia        | 1960            | U03660                |
| B1       | MVi/Yaounde.CMR/12.83        | Cameroon      | 1983            | AF079552              |
| B2       | MVs/Kinshasa.COD/42.05/3     | Congo         | 2005            | HM802035              |
| B2       | MVi/Kinshasa.COD/42.05/4     | Congo         | 2005            | HM802036              |
| B2       | MVi/Libreville.GAB/8.84      | Gabon         | 1984            | AF079551              |
| B2       | MVs/Cape Town.SOA/45.02      | South Africa  | 2002            | AY994535              |
| B2       | MVi/Mbujimayi.COD/06.06/4    | Congo         | 2006            | HM802026              |
| B2       | MVi/Mbujimayi.COD/06.06/2    | Congo         | 2006            | HM802020              |
| B2       | MVs/Bas-Congo.COD/06.06/5    | Congo         | 2006            | HM802019              |
| B2       | MVs/Bas-Congo.COD/06.06/9    | Congo         | 2006            | HM802021              |
| B2       | MVs/Luanda.AGO/13.03/1       | Angola        | 2003            | AY994537              |
| B3       | MVi/New York.USA/94          | United States | 1994            | L46752                |
| B3       | MVi/New Jersey.USA/45.05     | United States | 2005            | JN635408              |
| B3       | MVi/Ibadan.NGA/97/1          | Nigeria       | 1997            | AJ239133              |
| B3       | MVi/Lagos.NGA/97             | Nigeria       | 1997            | AJ239173              |
| B3       | MVi/Ibadan.NGA/97/3          | Nigeria       | 1997            | AJ239134              |
| B3       | MVi/Ibadan.NGA/10.98/4       | Nigeria       | 1998            | AJ239165              |
| B3       | MVi/Ibadan.NGA/10.98/5       | Nigeria       | 1998            | AJ239166              |
| B3       | MVi/Ibadan.NGA/10.98/6       | Nigeria       | 1998            | AJ239167              |
| B3       | MVi/Ibadan.NGA/7.98/1        | Nigeria       | 1998            | AJ239135              |
| B3       | MVi/Ibadan.NGA/7.98/2        | Nigeria       | 1998            | AJ239136              |
| B3       | MVi/Ibadan.NGA/7.98/3        | Nigeria       | 1998            | AJ239137              |
| B3       | MVi/Ibadan.NGA/8.98/10       | Nigeria       | 1998            | AJ239146              |
| B3       | MVi/Ibadan.NGA/8.98/11       | Nigeria       | 1998            | AJ239147              |
| B3       | MVi/Ibadan.NGA/8.98/2        | Nigeria       | 1998            | AJ239139              |
| B3       | MVi/Ibadan.NGA/8.98/8        | Nigeria       | 1998            | AJ239144              |
| B3       | MVi/Ibadan.NGA/8.98/1        | Nigeria       | 1998            | AJ239138              |
| B3       | MVi/Ibadan.NGA/9.98/12       | Nigeria       | 1998            | AJ239160              |
| B3       | MVi/Ibadan.NGA/9.98/3        | Nigeria       | 1998            | AJ239151              |
| B3       | MVi/Ibadan.NGA/9.98/4        | Nigeria       | 1998            | AJ239152              |
| B3       | MVi/Ibadan.NGA/9.98/5        | Nigeria       | 1998            | AJ239153              |
| B3       | MVi/Ibadan.NGA/9.98/6        | Nigeria       | 1998            | AJ239154              |
| B3       | MVi/Ibadan.NGA/9.98/7        | Nigeria       | 1998            | AJ239155              |
| B3       | MVi/Ibadan.NGA/9.98/8        | Nigeria       | 1998            | AJ239156              |
| B3       | MVi/Lagos.NGA/10.98          | Nigeria       | 1998            | AJ239170              |
| B3       | MVi/Lagos.NGA/11.98/1        | Nigeria       | 1998            | AJ239171              |
| B3       | MVi/Lagos.NGA/8.98           | Nigeria       | 1998            | AJ239169              |
| B3       | MVi/Ibadan.NGA/8.98/7        | Nigeria       | 1998            | AJ239143              |
| B3       | MVi/Accra.GHA/98             | Ghana         | 1998            | AJ239177              |
| B3       | MVi/Accra.GHA/9.98/1         | Ghana         | 1998            | AJ239174              |
| B3       | MVi/Accra.GHA/9.98/2         | Ghana         | 1998            | AJ239175              |
| B3       | MVi/Almeria.SPA/11.03/3      | Spain         | 2003            | FJ865561              |
| B3       | MVi/Lyon.FRA/94              | France        | 1994            | AF484953              |
| B3       | MVi/Caen.FRA/04              | France        | 2004            | DQ267505              |
| B3       | MVi/Lyon.FRA/20.04/1         | France        | 2004            | DQ267504              |
| B3       | MVi/GMB/93                   | Gambia        | 1993            | AF484954              |
| B3       | MVi/GMB/96                   | Gambia        | 1996            | AY059391              |
| B3       | MVi/Khartoum.SDN/33.97       | Sudan         | 1997            | AF453430              |
| B3       | MVi/Khartoum.SDN/36.97/2     | Sudan         | 1997            | AF453431              |
| B3       | MVi/Khartoum.SDN/28.00/5     | Sudan         | 2000            | AF453432              |
| B3       | MVi/Dande.BFA/17.01/1        | Burkina Faso  | 2001            | AY159463              |
| B3       | MVi/Padema.BFA/17.01/4       | Burkina Faso  | 2001            | AY159462              |
| B3       | MVi/Yaounde.CMR/01/9         | Cameroon      | 2001            | AF484952              |
| B3       | Mvi/Zliten.LBY/10.2007       | Libya         | 2007            | FN594772              |
| B3       | MVi/Zliten.LBY.14.09/4       | Libya         | 2009            | FN594724              |
| B3       | MVi/Sfax.TUN/18.02           | Tunisia       | 2002            | FN594773              |
| B3       | MVs/Gera.DEU/08.00           | Germany       | 2000            | AF480469              |

| Genotype | Strain                                | Country          | Collection year | Genbank accession No. |
|----------|---------------------------------------|------------------|-----------------|-----------------------|
| C1       | MVi/Tokyo.JPN/84                      | Japan            | 1984            | AY047365              |
| C1       | MVi/Osaka.JPN/84                      | Japan            | 1984            | AB045296              |
| C1       | MVi/JPN/85/1                          | Japan            | 1985            | Z80803                |
| C1       | MVi/Osaka.JPN/85                      | Japan            | 1985            | AB045297              |
| C1       | MVi/Madrid.ESP/81                     | Spain            | 1981            | Z80810                |
| C1       | MVs/Belfast.UNK/1/1955-sspe (UK88/55) | United Kingdom   | 1955            | AF399851              |
| C1       | MVs/Belfast.UNK/2/1956-sspe (UK85/56) | United Kingdom   | 1956            | AF399850              |
| C2       | MVi/Bethesda.Maryland.USA/77          | United States    | 1977            | M81898                |
| C2       | MVi/Illinois.USA/94                   | United States    | 1994            | L46739                |
| C2       | MVi/Tennessee.USA/94                  | United States    | 1994            | L46759                |
| C2       | MVi/Texas.USA/95                      | United States    | 1995            | AF009599              |
| C2       | MVi/New Mexico.USA/32.96              | United States    | 1996            | AF009593              |
| C2       | MVi/Texas.USA/16.96                   | United States    | 1996            | AF009594              |
| C2       | MVi/Utah.USA/23.96                    | United States    | 1996            | AF009596              |
| C2       | MVi/Bilthoven.NLD/91/1                | Netherlands      | 1991            | L46747                |
| C2       | MVi/DEU/92/2                          | Germany          | 1992            | Z80795                |
| C2       | MVi/DEU/92/3                          | Germany          | 1992            | Z80799                |
| C2       | MVi/DEU/92/6                          | Germany          | 1992            | Z80809                |
| C2       | MVi/DEU/92/7                          | Germany          | 1992            | Z80808                |
| C2       | MVi/Tuebingen.DEU/24.00               | Germany          | 2000            | AF480468              |
| C2       | MVi/KALAA.MAR/10.99/1                 | Morocco          | 1999            | AF458657              |
| C2       | MVi/Casablanca.MAR/19.03/2            | Morocco          | 2003            | DQ267500              |
| C2       | MVi/Taroudant.MAR/19.03/4             | Morocco          | 2003            | DQ267502              |
| C2       | MVi/Madrid.ESP/92/4                   | Spain            | 1992            | Z80814                |
| C2       | MVi/Madrid.ESP/92/5                   | Spain            | 1992            | Z80813                |
| C2       | MVi/Montreal.CAN/14.84                | Canada           | 1984            | AF410973              |
| C2       | MVi/Reuler.LUX/13.96                  | Luxembourg       | 1996            | Y19086                |
| C2       | MVi/Reuler.LUX/14.96/1                | Luxembourg       | 1996            | Y19087                |
| C2       | MVi/Reuler.LUX/16.96/1                | Luxembourg       | 1996            | Y19089                |
| C2       | MVi/Reuler.LUX/16.96/2                | Luxembourg       | 1996            | Y19090                |
| C2       | MVi/Walferdange.LUX/15.96             | Luxembourg       | 1996            | Y19092                |
| C2       | MVi/Luxembourg.LUX/23.97              | Luxembourg       | 1997            | Y19097                |
| C2       | MVs/Toulon.FRA/08.07                  | France           | 2007            | HM562898              |
| D1       | MVs/Belfast.GBR/60                    | United Kingdom   | 1960            | AY077712              |
| D1       | MVs/Belfast.GBR/69                    | United Kingdom   | 1969            | AY077713              |
| D1       | MVi/Bristol.GBR/74/1                  | United Kingdom   | 1974            | Z80805                |
| D1       | MVi/Bristol.GBR/74/2                  | United Kingdom   | 1974            | Z80804                |
| D2       | MVi/Johannesburg.ZAF/88/1             | South Africa     | 1988            | AF085198              |
| D2       | MVi/Lusaka.ZMB/34.01                  | Zambia           | 2001            | DQ845409              |
| D2       | MVi/Lusaka.ZMB/39.01                  | Zambia           | 2001            | DQ845412              |
| D2       | MVi/Lusaka.ZMB/4.02                   | Zambia           | 2002            | DQ845414              |
| D3       | MVi/Davis.California.USA/87           | United States    | 1987            | U97349                |
| D3       | MVi/Chicago.Illinois.USA/89           | United States    | 1989            | M81895                |
| D3       | MVi/Illinois.USA/89/2                 | United States    | 1989            | L46736                |
| D3       | MVi/California.USA/90                 | United States    | 1990            | L46725                |
| D3       | MVi/Guam.USA/94                       | United States    | 1994            | L46734                |
| D3       | MVi/California.USA/32.96/             | United States    | 1996            | AF009581              |
| D3       | MVi/California.USA/8.04/              | United States    | 2004            | JN635409              |
| D3       | MVi/Goroka.PNG/26.99                  | Papua New Guinea | 1999            | AB075200              |
| D3       | MVi/Goroka.PNG/42.99/4                | Papua New Guinea | 1999            | AB075201              |
| D3       | MVi/Taipeh.Taiwan.CHN/94              | China            | 1994            | AJ250060              |
| D3       | MVi/Hwalian.TWN/18.03/2               | China            | 2003            | EU914221              |
| D3       | MVi/Osaka.JPN/87/2                    | Japan            | 1987            | AB045299              |
| D3       | MVi/Osaka C.JPN/14.98/1               | Japan            | 1998            | AF384225              |
| D3       | MVi/Tokyo.JPN/99                      | Japan            | 1999            | AB089380              |
| D3       | MVi/Osaka C.JPN/22.00                 | Japan            | 2000            | AF384233              |

| Genotype | Strain                        | Country        | Collection year | Genbank accession No. |
|----------|-------------------------------|----------------|-----------------|-----------------------|
| D4       | MVi/Amsterdam.NLD/3.98        | Netherlands    | 1998            | AJ250067              |
| D4       | MVi/Coast-Kwale.KEN/31.02/1   | Kenya          | 2002            | AY249265              |
| D4       | MVi/Nairobi.KEN/23.02         | Kenya          | 2002            | AY249261              |
| D4       | MVs/Central.KEN/24.02         | Kenya          | 2002            | AY249263              |
| D4       | MVs/Nyanza.KEN/24.02/1        | Kenya          | 2002            | AY249264              |
| D4       | MVi/ETH/99/1                  | Ethiopia       | 1999            | AF280807              |
| D4       | MVi/ETH/99/2                  | Ethiopia       | 1999            | AF280805              |
| D4       | MVi/Glasgow.GBR/14.94         | United Kingdom | 1994            | GQ331933              |
| D4       | MVi/Karachi.PAK/89/1          | Pakistan       | 1989            | AB003182              |
| D4       | MVi/Karachi.PAK/89/2          | Pakistan       | 1989            | AB003179              |
| D4       | Mvi/Koungou.MAY.FRA/31.05/3   | France         | 2005            | EF428160              |
| D4       | MVi/Lyon.FRA/24.06/2          | France         | 2006            | EF428168              |
| D4       | Mvs/Reims.FRA/08.08           | France         | 2008            | GQ428195              |
| D4       | MVi/Montreal.CAN/38.89        | Canada         | 1989            | AF079554              |
| D4       | MVi/Washington.USA/95         | United States  | 1995            | AF009572              |
| D4       | MVi/Minnesota.USA/28.96       | United States  | 1996            | AF009571              |
| D4       | Mvi/Florida.USA/19.09         | United States  | 2009            | JN635403              |
| D4       | MVi/Phokhara.NPL/5.99         | Nepal          | 1999            | AJ250065              |
| D4       | MVs/Zagreb.HRV/48.03          | Croatia        | 2003            | AY594288              |
| D4       | MVs/Zagreb.CRO/30.06 (SSPE)   | Croatia        | 2006            | FJ475059              |
| D4       | MVs/Novosibirsk.RUS/49.00     | Russia         | 2000            | AY633620              |
| D4       | MVs/Vijaywada.Ind/51.06       | India          | 2006            | FJ387132              |
| D4       | MVs/Kangra.Ind/39.06/2        | India          | 2006            | FJ387138              |
| D4       | MVi/GULBARGA.IND/50.06        | India          | 2006            | FJ387146              |
| D4       | MVi/KOLAR.IND/49.06           | India          | 2006            | FJ387145              |
| D4       | MVs/Bijnore.Ind/08.06         | India          | 2006            | FJ387153              |
| D4       | MVs/Papumpare.Ind/51.07/2     | India          | 2007            | FJ387134              |
| D4       | MVs/Kargil.Ind/25.07/2        | India          | 2007            | FJ387139              |
| D4       | MVi/Perambalur.Ind/17.07      | India          | 2007            | FJ765087              |
| D4       | MVs/GANGTOK.IND/27.08/2       | India          | 2008            | FJ765072              |
| D4       | MVs/Minasgerais.BRA/41.11/    | Brazil         | 2011            | KC291548              |
| D4       | MVs/Riograndedosul.BRA/13.11/ | Brazil         | 2011            | KC291543              |
| D5       | MVi/Bangkok.THA/93            | Thailand       | 1993            | AF009580              |
| D5       | MVi/Bangkok.THA/94            | Thailand       | 1994            | AF009575              |
| D5       | MVi/Colorado.USA/94           | United States  | 1994            | L46727                |
| D5       | MVi/Nebraska.USA/94           | United States  | 1994            | L46745                |
| D5       | MVi/Washington.USA/94         | United States  | 1994            | L46766                |
| D5       | MVi/Massachusetts.USA/3.96    | United States  | 1996            | AF009577              |
| D5       | MVi/Washington.USA/19.96      | United States  | 1996            | AF009579              |
| D5       | MVi/Washington.USA/18.08/1    | United States  | 2008            | JN635405              |
| D5       | MVi/PLW/93                    | Palau          | 1993            | L46757                |
| D5       | MVi/Osaka.JPN/91              | Japan          | 1991            | AB045300              |
| D5       | MVi/Osaka C.JPN/12.98         | Japan          | 1998            | AF384222              |
| D5       | MVi/Osaka C.JPN/32.98         | Japan          | 1998            | AF384235              |
| D5       | MVi/Osaka C.JPN/9.00/1        | Japan          | 2000            | AF384241              |
| D5       | MVi/Tokyo.JPN/00/1            | Japan          | 2000            | AB089379              |
| D5       | MVi/Toronto.CAN/20.96         | Canada         | 1996            | AF410977              |
| D5       | MVi/Tuebingen.DEU/10.08       | Germany        | 2008            | GQ121274              |
| D5       | MVs/SaintMande.FRA/09.08      | France         | 2008            | GQ428197              |

| Genotype | Strain                                     | Country        | Collection year | Genbank accession No. |
|----------|--------------------------------------------|----------------|-----------------|-----------------------|
| D6       | MVi/New Jersey.USA/94                      | United States  | 1994            | L46749                |
| D6       | MVi/Michigan.USA/95                        | United States  | 1995            | AF009588              |
| D6       | MVi/Alaska.USA/6.96                        | United States  | 1996            | AF009590              |
| D6       | MVi/Berlin.DEU/47.00                       | Germany        | 2000            | AF480474              |
| D6       | MVi/Vancouver.CAN/7.97                     | Canada         | 1997            | AF410978              |
| D6       | MVi/DNK/96/10                              | Denmark        | 1996            | AF172974              |
| D6       | MVs/Glasgow.UNK/1990s-SSPE (UK125/90s)     | United Kingdom | 1990            | AF504041              |
| D6       | MVi/GBR/94/4                               | United Kingdom | 1994            | Y16101                |
| D6       | MVi/Dudelange.LUX/25.96                    | Luxembourg     | 1996            | Y19093                |
| D6       | MVi/Luxembourg.LUX/30.97/1                 | Luxembourg     | 1997            | Y19098                |
| D6       | MVi/Luxembourg.LUX/30.97/2                 | Luxembourg     | 1997            | Y19099                |
| D6       | MVi/Luxembourg.LUX/31.97                   | Luxembourg     | 1997            | Y19100                |
| D6       | MVi/Luxembourg.LUX/24.01                   | Luxembourg     | 2001            | FJ869876              |
| D6       | MVi/Madrid.ESP/94/7                        | Spain          | 1994            | Z80823                |
| D6       | MVi/Madrid.ESP/94/3                        | Spain          | 1994            | Z80816                |
| D6       | MVi/Madrid.ESP/95/2                        | Spain          | 1995            | Z80825                |
| D6       | MVi/Madrid.ESP/96                          | Spain          | 1996            | Z80832                |
| D6       | MVs/Novosibirsk.RUS/5.03                   | Russia         | 2003            | AY523581              |
| D6       | MVi/Novokuzneck.RUS/44.03/1                | Russia         | 2003            | HM801955              |
| D6       | MVi/Moscow.RUS/3.04/                       | Russia         | 2004            | HM801957              |
| D6       | MVi/NizhnyNovgorod.RUS/35.05/              | Russia         | 2005            | HM801937              |
| D6       | MVi/Rostov-na-Donu.RUS/15.05               | Russia         | 2005            | HM801935              |
| D6       | MVi/Orenburg.RUS/12.06                     | Russia         | 2006            | HM801942              |
| D6       | MVs/Zagreb.CRO/47.02/[D6]_SSPE             | Croatia        | 2002            | DQ227318              |
| D6       | MVs/Zagreb.CRO/08.03/_SSPE                 | Croatia        | 2003            | DQ227320              |
| D6       | MVi/Smorgon.BLR/20.06/1                    | Belarus        | 2006            | HM801905              |
| D7       | MVi/Duesseldorf.DEU/10.00                  | Germany        | 2000            | AF480471              |
| D7       | MVi/Greifswald.DEU/10.00/1                 | Germany        | 2000            | AF480472              |
| D7       | MVi/Paris.FRA/01/1                         | France         | 2001            | AY585728              |
| D7       | MVi/Lyon.FRA/03/1                          | France         | 2003            | AY585725              |
| D7       | MV/Marseille.FRA/03/1                      | France         | 2003            | AY585726              |
| D7       | MVi/Vic.AUS/16.85                          | Australia      | 1985            | AF247202              |
| D7       | MVi/Vic.AUS/51.86                          | Australia      | 1986            | AF247195              |
| D7       | MVi/Vic.AUS/29.88                          | Australia      | 1988            | AF247198              |
| D7       | MVi/Vic.AUS/42.88                          | Australia      | 1988            | AF247200              |
| D7       | MVi/Illinois.USA/50.99                     | United States  | 1999            | AY043461              |
| D7       | MVi/California.USA/16.03                   | United States  | 2003            | JN635410              |
| D7       | MVs/London.GBR/80                          | United Kingdom | 1980            | AF399848              |
| D7       | MVs/Nottingham2.UNK/1980s-SSPE (UK98/80s)  | United Kingdom | 1980            | AF504040              |
| D7       | MVs/Nottingham1.UNK/1980s-SSPE (UK111/80s) | United Kingdom | 1980            | AY077714              |
| D7       | MVs/Bang.IND/5.03/SSPE                     | India          | 2003            | DQ987235              |
| D7       | MVi/Chennai.IND/38.03                      | India          | 2003            | DQ987234              |
| D7       | MVs/Pune.IND/11.04/1                       | India          | 2004            | DQ987233              |
| D7       | MVs/Pune.Ind/10.07                         | India          | 2007            | FJ387157              |
| D8       | MVi/BenniMellal.MAR/05/3                   | Morocco        | 2005            | DQ779204              |
| D8       | MVi/Berlin.DEU/10.10/                      | Germany        | 2010            | JQ417681              |
| D8       | MVi/Essen.DEU/12.10/                       | Germany        | 2010            | JQ417684              |
| D8       | MVi/ETH/98                                 | Ethiopia       | 1998            | AF280806              |
| D8       | MVi/GBR/94/3                               | United Kingdom | 1994            | U29285                |
| D8       | MVi/Hetauda.NPL/2.99                       | Nepal          | 1999            | AJ250063              |
| D8       | MVi/Janakpur.NPL/2.99/1                    | Nepal          | 1999            | AJ250061              |
| D8       | MVi/Kathmandu.NPL/5.99                     | Nepal          | 1999            | AJ250064              |
| D8       | MVi/Sydney.AUS/2.03                        | Australia      | 2003            | DQ852613              |
| D8       | MVi/Washington.USA/12.99                   | United States  | 1999            | AY043462              |
| D8       | MVi/Texas.USA/4.07                         | United States  | 2007            | JN635407              |
| D8       | MVi/Virginia.USA/15.09                     | United States  | 2009            | JN635404              |
| D8       | MVs/UP.IND/42.01/10                        | India          | 2001            | JN995537              |
| D8       | MVs/UP.IND/42.04/10                        | India          | 2004            | JN995540              |
| D8       | MVs/Pune.Ind/48.05                         | India          | 2005            | FJ387147              |
| D8       | MVi/BIJAPUR.IND/39.06                      | India          | 2006            | FJ387142              |
| D8       | MVi/GADAG.IND/45.06                        | India          | 2006            | FJ387144              |
| D8       | MVi/KOPPAL.IND/39.06                       | India          | 2006            | FJ387141              |
| D8       | MVi/MYSORE.IND/44.06                       | India          | 2006            | FJ387143              |
| D8       | MVi/Vellore.Ind/14.06                      | India          | 2006            | FJ765086              |
| D8       | MVs/Bijnore.Ind/07.06/2                    | India          | 2006            | FJ387154              |
| D8       | MVs/Chandigarh.IND/14.06                   | India          | 2006            | FJ387136              |
| D8       | MVs/Mayurbhanj.Ind/42.06/2                 | India          | 2006            | FJ387150              |
| D8       | MVs/PortBlair.Ind/06.06/1/OF               | India          | 2006            | FJ387130              |
| D8       | MVs/Pune.Ind/45.06/1                       | India          | 2006            | FJ387148              |
| D8       | MVs/PURULIA.IND/38.06                      | India          | 2006            | FJ387156              |
| D8       | MVs/Vijaywada.Ind/50.06                    | India          | 2006            | FJ387133              |
| D8       | MVs/GANGTOK.IND/22.08                      | India          | 2008            | FJ765071              |
| D8       | MVi/Tumkur.Ind/04.08/3                     | India          | 2008            | FJ719488              |
| D8       | MVi/Vicenza.ITA/12.10/2                    | Italy          | 2010            | KC117298              |
| D8       | MVi/Montreal.CAN/19.98                     | Canada         | 1998            | AF410985              |
| D8       | MVs/Ontario.CAN/30.13/                     | Canada         | 2013            | KF574437              |

| Genotype | Strain                           | Country        | Collection year | Genbank accession No. |
|----------|----------------------------------|----------------|-----------------|-----------------------|
| D9       | MVi/Yamagata.JPN/5.04            | Japan          | 2004            | AB186911              |
| D9       | MVi/Aichi.JPN/44.06              | Japan          | 2006            | AB426901              |
| D9       | MVi/Yamagata.JPN/12.09           | Japan          | 2009            | AB509377              |
| D9       | Mvi/Nice.FRA/20.08/2             | France         | 2008            | GQ428194              |
| D9       | MVs/NT.AUS/20.99                 | Australia      | 1999            | AY127854              |
| D9       | MVi/Vic.AUS/12.99                | Australia      | 1999            | AY127853              |
| D10      | MVi/Kampala.UGA/51.00.1          | Uganda         | 2000            | AY923213              |
| D10      | MVi/Kampala.UGA/3.01             | Uganda         | 2001            | AY923214              |
| D11      | MVi/Menglian.Yunnan.CHN/47.09    | China          | 2009            | GU440576              |
| E        | MVi/DEU/71                       | Germany        | 1971            | Z80797                |
| E        | MVi/Montreal.CAN/11.87           | Canada         | 1987            | AF410974              |
| E        | MVi/USA/70                       | United States  | 1970            | Z80798                |
| F        | MVs/Madrid.SPA/94 SSPE           | Spain          | 1994            | Z80830                |
| G1       | MVi/Berkeley.California.USA/2.83 | United States  | 1983            | AF079553              |
| G2       | MVi/Amsterdam.NLD/49.97          | Netherlands    | 1997            | AF171231              |
| G2       | MVi/Jakarta.IDN/32.99            | Indonesia      | 1999            | AF243851              |
| G3       | MVi/Gresik.IDN/18.02             | Indonesia      | 2002            | AY184218              |
| G3       | MVs/Vic.AUS/24.99                | Australia      | 1999            | AF353621              |
| H1       | MVi/Amsterdam.NLD/27.97          | Netherlands    | 1997            | AJ250066              |
| H1       | MVi/GBR/96                       | United Kingdom | 1996            | Y16098                |
| H1       | MVi/Shandong.CHN/93/2            | China          | 1993            | AF045196              |
| H1       | MVi/Hunan.CHN/93/6               | China          | 1993            | AF045193              |
| H1       | MVi/Hunan.CHN/93/7               | China          | 1993            | AF045201              |
| H1       | MVi/Beijing.CHN/94/4             | China          | 1994            | AF045194              |
| H1       | MVi/Hebei.CHN/94/2               | China          | 1994            | AF045200              |
| H1       | MVi/Hunan.CHN/94/7               | China          | 1994            | AF045202              |
| H1       | MVi/Taoyuan.TWN.CHN/24.94/1      | China          | 1994            | EU914213              |
| H1       | MVi/CHN/97                       | China          | 1997            | Y16096                |
| H1       | MVi/Shenyang.CHN/22.99           | China          | 1999            | GQ338160              |
| H1       | MVi/Taichung.TWN.CHN/40.02/2     | China          | 2002            | EU914219              |
| H1       | MVs/Taichung.TWN.CHN/36.02       | China          | 2002            | EU914218              |
| H1       | MVs/Taipei.TWN.CHN/26.02         | China          | 2002            | EU914216              |
| H1       | MVs/Taoyuan.TWN.CHN/45.01        | China          | 2001            | EU914215              |
| H1       | MVi/Zhejiang.CHN/02/2            | China          | 2002            | AY556538              |
| H1       | MVi/Taoyuan.TWN.CHN/20.03        | China          | 2003            | EU914222              |
| H1       | MVi/Ninbo.Zhejiang.CHN/30.04/02  | China          | 2004            | DQ192531              |
| H1       | MVi/Ninbo.Zhejiang.CHN/08.05/02  | China          | 2005            | DQ192532              |
| H1       | MVi/Zhejiang.CHN/10.05/2         | China          | 2005            | DQ011611              |
| H1       | MVi/Zhejiang.CHN/7.05/4          | China          | 2005            | DQ211902              |
| H1       | MVi/Zhejiang.CHN/9.05/10         | China          | 2005            | DQ011610              |
| H1       | MVs/Yunnan.CHN/19.06             | China          | 2006            | FJ161211              |
| H1       | MVi/Sofia.BGR/19.05              | Bulgaria       | 2005            | FJ808736              |
| H1       | MVi/Tokyo.JPN/00/2               | Japan          | 2000            | AB089378              |
| H1       | MVs/Kwangju.KOR/46.00            | South Korea    | 2000            | AY027629              |
| H1       | MVi/Pennsylvania.USA/20.09       | United States  | 2009            | JN635411              |
| H2       | MVi/Beijing.CHN/94/1             | China          | 1994            | AF045203              |
| H2       | MVi/Hanoi.VNM/23.98/1            | Viet Nam       | 1998            | AY026867              |
| H2       | MVi/Hoabinh.VNM/12.98/4          | Viet Nam       | 1998            | AY026869              |



Table S2. Models compared by AICM.

| Model             |                                               | AICM (SE)                               |
|-------------------|-----------------------------------------------|-----------------------------------------|
| Clock model       | Strict clock                                  | 45762.7 ( $\pm 0.515$ )                 |
|                   | Uncorrelated lognormal relaxed clock          | 45771.8 ( $\pm 2.808$ )                 |
|                   | <b>Uncorrelated exponential relaxed clock</b> | <b>45389.8 (<math>\pm 0.837</math>)</b> |
|                   | Random local clock                            | 45883.5 ( $\pm 1.834$ )                 |
| Demographic model | Constant size                                 | 45389.8 ( $\pm 1.400$ )                 |
|                   | <b>Exponential growth</b>                     | <b>45377.6 (<math>\pm 0.937</math>)</b> |

Data and models with bold letters are used in this study.

AICM, Akaike's information criterion through MCMC; SE, Standard error.
